# Supplementary material for: The Contribution of Epigenetics to Evolutionary Adaptation in Zingiber kawagoii Hayata (Zingiberaceae) Endemic to Taiwan
Source: MDPI journal article supplement (doi:10.3390/plants12071558), 2023-04-04
Supplement: s1 [file s1]

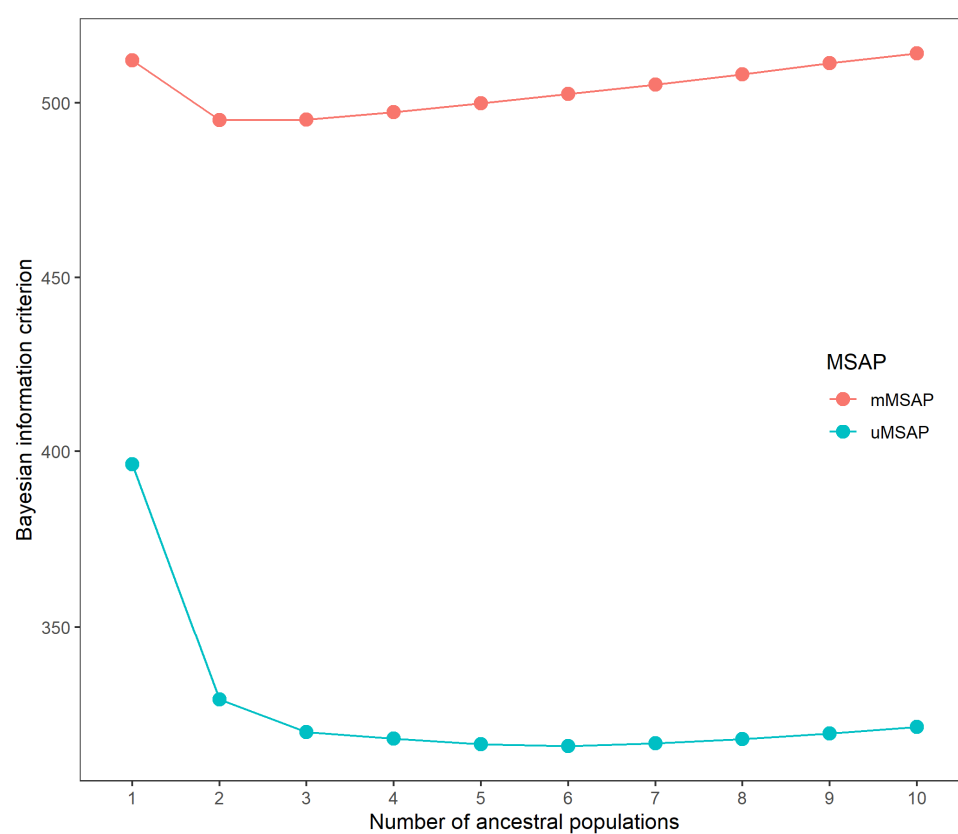

**Figure S1.** Bayesian information criterion for evaluation of clustering scenarios analyzed based on mMSAP and uMSAP.

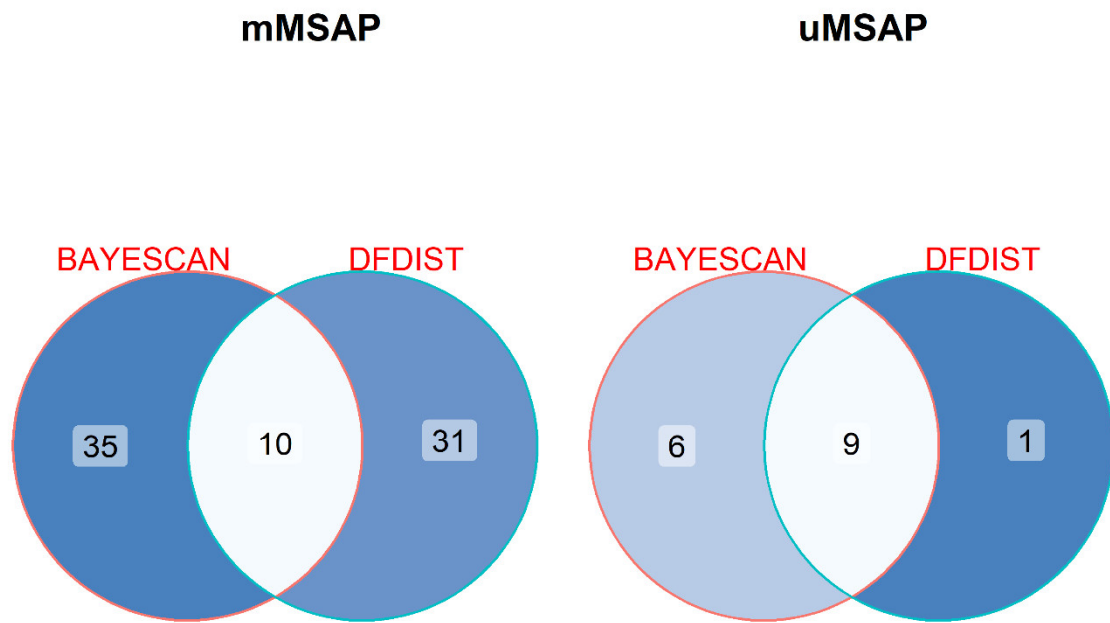

**Figure. S2.** The Venn diagrams showing the number of outlier MSAP (mMSAP and uMSAP) loci identified by genome scans of natural populations of *Zingiber kawagooii* using BAYESCAN and DFDIST. Numbers are presented for each separate group, and the intersection represents the number of loci identified by both genome scan methods.

**Table S1.** Primer combinations, number of markers, and error rate per locus calculated in MSAP technique.

| Primer Combination     | Number of Markers | Number of mMSAP Markers | Number of uMSAP Markers | Error Rate (%) |             | Combined Error Rate (%) |
|------------------------|-------------------|-------------------------|-------------------------|----------------|-------------|-------------------------|
|                        |                   |                         |                         | <i>HpaII</i>   | <i>MspI</i> |                         |
| 1 E00 ACAGT + HM00 AGG | 22                | 21                      | 15                      | 2.82           | 1.96        | 4.666                   |
| 2 E00 ACAGT + HM00 CAG | 38                | 35                      | 26                      | 2.89           | 2.05        | 4.823                   |
| 3 E00 ACAGT + HM00 GCA | 50                | 42                      | 33                      | 1.97           | 2.23        | 4.112                   |
| 4 E00 ACAAG + HM00 CAG | 107               | 90                      | 81                      | 1.47           | 1.85        | 3.262                   |
| 5 E00 ACAAG + HM00 CGT | 95                | 85                      | 70                      | 1.47           | 1.57        | 2.995                   |
| 6 E00 ACAAG + HM00 CCC | 30                | 26                      | 20                      | 1.99           | 2.20        | 4.109                   |
| 7 E00 ACAAG + HM00 CTG | 38                | 33                      | 28                      | 2.20           | 2.42        | 4.518                   |
| 8 E00 ACAAG + HM00 TAC | 68                | 63                      | 56                      | 2.15           | 2.42        | 4.466                   |
| 9 E00 ACATA + HM00 TAC | 33                | 29                      | 25                      | 2.40           | 2.41        | 4.694                   |
|                        | 481 (53.4)        | 424 (47.1)              | 354 (39.3)              | (2.15)         | (2.12)      | (4.18)                  |

E00 (5'-GACTGCGTACCAATTC-3')

HM00 (*HpaII*-*MspI*, 5'-ATCATGAGTCCTGCTCGG-3')

**Table S2.** The 16 environmental variables of the 17 populations of *Zingiber kawagooi*. See **Table 1** for population code.

| Population | Aspectt | Elevation | Slope | CLO | EVI | LAI | MI    | NDVI | PET    | RH   | Soil_pH | WS <sub>mean</sub> | BIO7 | BIO9 | BIO12  | BIO19 |
|------------|---------|-----------|-------|-----|-----|-----|-------|------|--------|------|---------|--------------------|------|------|--------|-------|
| AT         | 288.0   | 610.0     | 22.7  | 6.8 | 0.5 | 5.3 | 53.9  | 0.8  | 1380.9 | 78.2 | 6.0     | 3.1                | 15.6 | 16.4 | 1933.0 | 181.0 |
| BTWS       | 120.1   | 1192.0    | 34.5  | 6.0 | 0.5 | 5.3 | 132.3 | 0.8  | 1497.8 | 76.7 | 4.9     | 2.7                | 14.9 | 15.5 | 4616.0 | 103.0 |
| EFS        | 314.4   | 769.0     | 35.9  | 5.8 | 0.5 | 6.2 | 72.6  | 0.9  | 1634.2 | 78.2 | 4.2     | 2.7                | 18.1 | 17.6 | 2494.0 | 196.0 |
| HDD        | 299.2   | 432.0     | 31.1  | 7.6 | 0.5 | 6.0 | 159.8 | 0.8  | 1419.2 | 78.9 | 4.6     | 2.6                | 18.4 | 16.3 | 3481.0 | 650.0 |
| JS         | 165.0   | 850.0     | 35.3  | 6.7 | 0.5 | 6.1 | 185.1 | 0.9  | 1436.6 | 78.9 | 5.5     | 2.5                | 17.3 | 9.8  | 2539.0 | 337.0 |
| JSY        | 81.0    | 1488.0    | 33.1  | 6.1 | 0.5 | 5.1 | 133.9 | 0.8  | 1450.0 | 75.9 | 4.9     | 2.7                | 14.3 | 13.2 | 4749.0 | 244.0 |
| KTS        | 290.7   | 583.0     | 18.0  | 5.6 | 0.5 | 5.7 | 111.6 | 0.8  | 1622.9 | 78.7 | 6.3     | 2.7                | 17.0 | 17.8 | 3120.0 | 101.0 |
| LY         | 235.6   | 302.0     | 22.8  | 7.6 | 0.5 | 5.7 | 156.4 | 0.8  | 1379.9 | 87.6 | 7.3     | 7.5                | 13.8 | 21.3 | 2760.0 | 426.0 |
| NZ         | 269.4   | 457.0     | 21.9  | 6.1 | 0.4 | 6.1 | 124.6 | 0.8  | 1489.5 | 78.7 | 4.5     | 2.6                | 18.1 | 17.0 | 2564.0 | 278.0 |
| RF         | 250.4   | 394.0     | 25.5  | 7.6 | 0.4 | 4.8 | 177.1 | 0.8  | 1398.8 | 78.3 | 4.6     | 2.8                | 18.4 | 16.7 | 3282.0 | 781.0 |
| SBS        | 81.7    | 1347.0    | 28.9  | 6.0 | 0.5 | 6.3 | 142.6 | 0.8  | 1855.1 | 81.4 | 4.7     | 2.2                | 16.0 | 14.2 | 2726.0 | 141.0 |
| SL         | 63.7    | 255.0     | 10.8  | 6.1 | 0.5 | 6.3 | 66.8  | 0.9  | 1830.7 | 76.2 | 5.4     | 3.0                | 14.4 | 19.2 | 3100.0 | 169.0 |
| SML        | 256.7   | 816.0     | 21.4  | 6.2 | 0.5 | 5.7 | 82.2  | 0.8  | 1757.0 | 81.1 | 4.5     | 1.3                | 16.5 | 16.1 | 2262.0 | 162.0 |
| THS        | 323.1   | 937.0     | 3.4   | 5.8 | 0.5 | 6.1 | 123.5 | 0.8  | 1632.2 | 78.3 | 4.3     | 2.5                | 17.1 | 14.5 | 2569.0 | 192.0 |
| TRK        | 294.9   | 929.0     | 20.5  | 7.0 | 0.5 | 5.8 | 143.7 | 0.8  | 1453.3 | 78.8 | 6.5     | 2.8                | 16.5 | 13.6 | 2292.0 | 273.0 |
| WL         | 105.7   | 143.0     | 29.3  | 7.3 | 0.4 | 5.5 | 129.7 | 0.8  | 1477.3 | 78.8 | 5.0     | 2.4                | 18.5 | 14.3 | 3231.0 | 481.0 |
| WLS        | 358.4   | 694.0     | 36.7  | 5.8 | 0.5 | 6.0 | 141.7 | 0.8  | 1769.9 | 77.3 | 4.9     | 2.8                | 16.1 | 18.3 | 3093.0 | 89.0  |

Aspect (0–360°); Elevation (m); Slope (0–90°); BIO7, annual temperature range (°C); BIO9, Mean Temperature of Driest Quarter (°C); BIO12, annual precipitation (mm); BIO19, precipitation of the coldest quarter (mm); CLO, cloud cover (); EVI, enhanced vegetation index; LAI, leaf area index (m<sup>2</sup>/m<sup>2</sup>); MI, annual moisture index (unitless); NDVI, normalized difference vegetation index (unitless); PET, annual total potential evapotranspiration (kg/m<sup>2</sup>/year); RH, relative humidity (%); WS<sub>mean</sub>, mean wind speed (m/s).

**Table S3.** Summary of Tukey's post-hoc pairwise comparisons of the mean unbiased expected heterozygosity ( $uH_E$ ) per locus in *Zingiber kawagooii* between marker types (AFLP, mMSAP, and uMSAP) using a linear mixed effect model. In linear mixed effect model, marker type was treated as a fixed factor and population as a random factor.

|                 | Mean    | SE      | df    | <i>t</i> | <i>p</i> |
|-----------------|---------|---------|-------|----------|----------|
| AFLP vs. mMSAP  | -0.1193 | 0.00270 | 24444 | -44.128  | < 0.001  |
| AFLP vs. uMSAP  | -0.0268 | 0.00286 | 24444 | 9.363    | < 0.001  |
| mMSAP vs. uMSAP | 0.0925  | 0.00313 | 24444 | 29.571   | < 0.001  |

SE, standard error; df, degree of freedom.

**Table S4.** Matrix of pairwise  $F_{ST}$ (lower diagonal) and p values (upper diagonal) based on the total mMSAP and uMSAP data of the 17 populations of *Z. kawagooii* estimated using ARLEQUIN. Significance was determined by 10,000 permutations. See **Table 1** for population code.

|         | AT    | BTWS  | EFS   | HDD   | JS    | JSY   | KTS   | LY    | NZ    | RF    | SBS    | SL    | SML   | THS   | TRK   | WL    | WLS   |
|---------|-------|-------|-------|-------|-------|-------|-------|-------|-------|-------|--------|-------|-------|-------|-------|-------|-------|
| mMSAP   |       |       |       |       |       |       |       |       |       |       |        |       |       |       |       |       |       |
| AT      |       | 0     | 0     | 0     | 0     | 0     | 0     | 0     | 0     | 0     | 0.0001 | 0     | 0     | 0     | 0     | 0     | 0     |
| BTWS    | 0.093 |       | 0.033 | 0.000 | 0.000 | 0.035 | 0.000 | 0.017 | 0.000 | 0.020 | 0.039  | 0.070 | 0.000 | 0.001 | 0.000 | 0.150 | 0.109 |
| EFS     | 0.086 | 0.033 |       | 0.012 | 0.000 | 0.022 | 0.000 | 0.004 | 0.000 | 0.235 | 0.152  | 0.035 | 0.000 | 0.018 | 0.000 | 0.224 | 0.045 |
| HDD     | 0.050 | 0.090 | 0.047 |       | 0.000 | 0.000 | 0.000 | 0.000 | 0.001 | 0.004 | 0.005  | 0.001 | 0.000 | 0.002 | 0.000 | 0.002 | 0.000 |
| JS      | 0.077 | 0.131 | 0.090 | 0.075 |       | 0.000 | 0.000 | 0.000 | 0.000 | 0.000 | 0.000  | 0.000 | 0.000 | 0.000 | 0.002 | 0.000 | 0.000 |
| JSY     | 0.070 | 0.031 | 0.043 | 0.069 | 0.095 |       | 0.000 | 0.031 | 0.000 | 0.004 | 0.035  | 0.057 | 0.000 | 0.002 | 0.000 | 0.065 | 0.007 |
| KTS     | 0.055 | 0.114 | 0.092 | 0.042 | 0.079 | 0.081 |       | 0.000 | 0.000 | 0.000 | 0.000  | 0.000 | 0.000 | 0.000 | 0.000 | 0.000 | 0.000 |
| LY      | 0.094 | 0.041 | 0.066 | 0.083 | 0.133 | 0.033 | 0.110 |       | 0.000 | 0.002 | 0.007  | 0.006 | 0.000 | 0.000 | 0.000 | 0.124 | 0.002 |
| NZ      | 0.080 | 0.112 | 0.082 | 0.042 | 0.054 | 0.079 | 0.069 | 0.103 |       | 0.000 | 0.005  | 0.000 | 0.000 | 0.000 | 0.000 | 0.000 | 0.000 |
| RF      | 0.069 | 0.040 | 0.007 | 0.054 | 0.102 | 0.057 | 0.077 | 0.076 | 0.088 |       | 0.134  | 0.006 | 0.000 | 0.010 | 0.000 | 0.109 | 0.070 |
| SBS     | 0.056 | 0.030 | 0.013 | 0.054 | 0.072 | 0.030 | 0.072 | 0.051 | 0.053 | 0.014 |        | 0.018 | 0.000 | 0.025 | 0.000 | 0.193 | 0.015 |
| SL      | 0.091 | 0.024 | 0.036 | 0.066 | 0.121 | 0.025 | 0.102 | 0.052 | 0.092 | 0.054 | 0.042  |       | 0.000 | 0.005 | 0.000 | 0.069 | 0.009 |
| SML     | 0.087 | 0.122 | 0.072 | 0.056 | 0.051 | 0.089 | 0.078 | 0.111 | 0.061 | 0.103 | 0.080  | 0.094 |       | 0.000 | 0.000 | 0.000 | 0.000 |
| THS     | 0.073 | 0.085 | 0.046 | 0.046 | 0.074 | 0.065 | 0.096 | 0.082 | 0.058 | 0.052 | 0.039  | 0.054 | 0.065 |       | 0.000 | 0.013 | 0.001 |
| TRK     | 0.071 | 0.111 | 0.064 | 0.048 | 0.026 | 0.078 | 0.071 | 0.112 | 0.043 | 0.085 | 0.062  | 0.100 | 0.043 | 0.069 |       | 0.000 | 0.000 |
| WL      | 0.072 | 0.013 | 0.008 | 0.054 | 0.103 | 0.024 | 0.081 | 0.021 | 0.084 | 0.019 | 0.010  | 0.025 | 0.080 | 0.054 | 0.073 |       | 0.114 |
| WLS     | 0.148 | 0.016 | 0.030 | 0.134 | 0.188 | 0.062 | 0.178 | 0.090 | 0.170 | 0.025 | 0.047  | 0.058 | 0.182 | 0.121 | 0.160 | 0.020 |       |
| Average | 0.080 | 0.062 | 0.046 | 0.052 | 0.069 | 0.042 | 0.058 | 0.047 | 0.041 | 0.039 | 0.041  | 0.033 | 0.023 | 0.019 | 0.015 | 0.061 | 0.023 |
| uMSAP   |       |       |       |       |       |       |       |       |       |       |        |       |       |       |       |       |       |
| AT      |       | 0     | 0     | 0     | 0     | 0     | 0     | 0     | 0     | 0     | 0      | 0     | 0     | 0     | 0     | 0     | 0     |
| BTWS    | 0.265 |       | 0.121 | 0.001 | 0.000 | 0.107 | 0.000 | 0.059 | 0.000 | 0.285 | 0.107  | 0.168 | 0.000 | 0.019 | 0.000 | 0.329 | 0.084 |
| EFS     | 0.251 | 0.031 |       | 0.008 | 0.000 | 0.047 | 0.000 | 0.024 | 0.000 | 0.231 | 0.278  | 0.052 | 0.007 | 0.090 | 0.000 | 0.227 | 0.029 |
| HDD     | 0.271 | 0.207 | 0.156 |       | 0.000 | 0.000 | 0.000 | 0.000 | 0.000 | 0.001 | 0.002  | 0.000 | 0.000 | 0.001 | 0.000 | 0.000 | 0.000 |
| JS      | 0.281 | 0.250 | 0.172 | 0.197 |       | 0.000 | 0.000 | 0.000 | 0.000 | 0.000 | 0.001  | 0.000 | 0.000 | 0.000 | 0.000 | 0.000 | 0.000 |
| JSY     | 0.203 | 0.044 | 0.070 | 0.169 | 0.202 |       | 0.000 | 0.046 | 0.000 | 0.048 | 0.071  | 0.137 | 0.000 | 0.009 | 0.000 | 0.092 | 0.016 |
| KTS     | 0.178 | 0.270 | 0.208 | 0.203 | 0.203 | 0.212 |       | 0.000 | 0.000 | 0.000 | 0.000  | 0.000 | 0.000 | 0.000 | 0.000 | 0.000 | 0.000 |
| LY      | 0.288 | 0.077 | 0.114 | 0.234 | 0.281 | 0.076 | 0.307 |       | 0.000 | 0.011 | 0.009  | 0.028 | 0.000 | 0.000 | 0.000 | 0.089 | 0.002 |
| NZ      | 0.211 | 0.240 | 0.181 | 0.171 | 0.167 | 0.170 | 0.200 | 0.248 |       | 0.000 | 0.006  | 0.000 | 0.000 | 0.000 | 0.000 | 0.000 | 0.000 |
| RF      | 0.238 | 0.006 | 0.016 | 0.184 | 0.214 | 0.067 | 0.254 | 0.125 | 0.232 |       | 0.236  | 0.086 | 0.000 | 0.031 | 0.000 | 0.271 | 0.096 |
| SBS     | 0.201 | 0.055 | 0.002 | 0.172 | 0.161 | 0.067 | 0.198 | 0.130 | 0.156 | 0.018 |        | 0.041 | 0.000 | 0.088 | 0.000 | 0.182 | 0.019 |
| SL      | 0.285 | 0.026 | 0.072 | 0.230 | 0.292 | 0.029 | 0.298 | 0.106 | 0.270 | 0.070 | 0.086  |       | 0.000 | 0.004 | 0.000 | 0.161 | 0.046 |
| SML     | 0.252 | 0.232 | 0.137 | 0.174 | 0.182 | 0.154 | 0.160 | 0.254 | 0.173 | 0.206 | 0.145  | 0.238 |       | 0.000 | 0.000 | 0.000 | 0.000 |
| THS     | 0.209 | 0.129 | 0.064 | 0.124 | 0.172 | 0.106 | 0.170 | 0.173 | 0.128 | 0.105 | 0.056  | 0.157 | 0.116 |       | 0.000 | 0.025 | 0.000 |
| TRK     | 0.270 | 0.259 | 0.207 | 0.196 | 0.154 | 0.201 | 0.185 | 0.290 | 0.125 | 0.244 | 0.192  | 0.294 | 0.182 | 0.137 |       | 0.000 | 0.000 |
| WL      | 0.271 | 0.007 | 0.014 | 0.153 | 0.224 | 0.054 | 0.246 | 0.060 | 0.207 | 0.011 | 0.035  | 0.042 | 0.219 | 0.105 | 0.228 |       | 0.070 |
| WLS     | 0.461 | 0.052 | 0.111 | 0.389 | 0.435 | 0.176 | 0.462 | 0.237 | 0.436 | 0.075 | 0.150  | 0.113 | 0.409 | 0.286 | 0.460 | 0.090 |       |
| Average | 0.259 | 0.118 | 0.103 | 0.163 | 0.168 | 0.092 | 0.155 | 0.110 | 0.108 | 0.082 | 0.086  | 0.085 | 0.058 | 0.048 | 0.043 | 0.092 | 0.023 |

**Table S5.**  $F_{ST}$  outliers identified by BAYESCAN and DFDIST strongly associated with environmental variables. Codes below the environmental columns represent strong correlations between  $F_{ST}$  outliers and environmental variables identified using LFMM (L), Samβada (S), and rstanarm (R).

| Locus       | BAYESCAN DFDIST |          | Environmental Variable |       |      |      |       |       |     |     |     |     |      |     |         |                    |
|-------------|-----------------|----------|------------------------|-------|------|------|-------|-------|-----|-----|-----|-----|------|-----|---------|--------------------|
|             | $\log_{10}(PO)$ | $F_{ST}$ | Aspect                 | Slope | BIO7 | BIO9 | BIO12 | BIO19 | CLO | EVI | LAI | MI  | NDVI | PET | Soil pH | WS <sub>mean</sub> |
| mMSAP       |                 |          |                        |       |      |      |       |       |     |     |     |     |      |     |         |                    |
| mX03HM_4577 | 4.2218          | 0.2518   |                        | R     |      |      |       |       |     |     |     |     | R    | R   | R       | R                  |
| mX06HM_2011 | 1.1753          | 0.1185   |                        | R     |      |      | S     |       |     |     |     |     |      |     |         | R                  |
| mX07HM_2135 | 2.0847          | 0.1313   |                        | R     |      |      |       |       |     |     |     |     |      | R   | R       | R                  |
| mX07HM_2602 | 4.3979          | 0.1693   |                        | LR    |      |      |       |       |     |     |     |     |      |     |         | L                  |
| mX07HM_3712 | 1000            | 0.2727   | L                      | L     | LS   | L    | LS    |       |     | L   | S   |     | L    |     | L       | L                  |
| mX09HM_4962 | 2.6769          | 0.2121   |                        |       |      |      |       |       |     |     |     |     |      | R   | R       | LR                 |
| mX10HM_2924 | 2.4854          | 0.1308   | LSR                    |       | LS   |      | L     |       |     | L   | R   | L   | LSR  | R   | L       | L                  |
| mX10HM_4449 | 2.6566          | 0.1827   | LSR                    |       | LS   | L    | L     |       |     | LS  |     |     | L    |     | L       | L                  |
| mX10HM_4950 | 1.3389          | 0.1653   |                        | R     |      |      |       |       |     |     | R   |     |      | R   | R       |                    |
| mX20HM_2494 | 1000            | 0.2537   | LSR                    |       | L    |      | LS    |       |     |     |     |     | R    | R   |         | LR                 |
| uMSAP       |                 |          |                        |       |      |      |       |       |     |     |     |     |      |     |         |                    |
| uX01HM_2007 | 1000            | 0.2810   |                        | LR    |      |      | R     |       |     | L   |     | L   |      |     |         | LR                 |
| uX01HM_2132 | 1000            | 0.3360   |                        | R     | L    | L    |       |       |     | L   | R   |     | LR   |     | R       | LSR                |
| uX03HM_1635 | 1000            | 0.3189   | LSR                    |       | LSR  |      |       |       |     |     | R   |     | R    |     | R       |                    |
| uX03HM_3598 | 1000            | 0.3546   |                        | R     | L    | LSR  |       |       |     | L   | R   |     | LR   |     | R       | LSR                |
| uX06HM_2011 | 1000            | 0.3240   | LSR                    | R     | LS   | LR   | LS    | L     | L   |     | R   | L   |      | LS  |         |                    |
| uX06HM_2055 | 2.6045          | 0.4264   |                        |       |      |      | R     |       |     | S   |     | SR  |      |     |         |                    |
| uX06HM_3270 | 1000            | 0.3444   | SR                     | LS    | L    | L    | S     |       |     | L   |     | LSR | R    |     |         |                    |
| uX07HM_1962 | 1000            | 0.3008   |                        | R     |      | R    | LS    |       |     |     | R   |     | R    | L   | R       | R                  |
| uX07HM_2326 | 1000            | 0.4354   | LSR                    |       | LSR  | LSR  |       | L     |     | L   |     | L   |      | LS  | R       |                    |
